# Supplementary material
Source: PubMed Central journal article supplement (PMC2651347)
Supplement: 0811205106_0811205106SI.pdf [file 0811205106_0811205106SI.pdf]

# Supporting Information

Herron et al. 10.1073/pnas.0811205106

**Table S1. GenBank accession numbers of DNA sequences used in the broad-scale analyses**

| Species                                 | atpB       | psaA        | psaB       | psbC        | rbcl     | 18S      |
|-----------------------------------------|------------|-------------|------------|-------------|----------|----------|
| <i>Aribidopsis thaliana</i>             | NC000932   | NC000932    | NC000932   | NC000932    | NC000932 | X16077   |
| <i>Astrephomene gubernaculifera</i>     | AB014022–3 | AB044233–4  | AB044458   | AB044513–4  | D63428   |          |
| <i>Bangiopsis subsimplex</i>            |            | AY119700    | AY391382   |             | AY119772 | AF168627 |
| <i>Basichlamys sacculifera</i>          | AB014015   | AB044416    | AB044467–8 | AB044526    | D63430   |          |
| <i>Cabomba caroliniana</i>              | AF187058   |             |            | AF123815    | M77027   | AF096691 |
| <i>Carteria crucifera</i>               | AB084320   |             | AB084358   |             | D63431   | D86501   |
| <i>Chaetospheridium globosum</i>        | NC004115   | NC004115    | NC004115   | NC004115    | NC004115 | AF113506 |
| <i>Chlamydomonas debaryana</i>          | AB014034   | AB044417–8  | AB044469   | AB044527    | D86838   | AF008240 |
| <i>C. moewusii</i>                      | AB014035   |             | AB084355   |             | M15842   | U41174   |
| <i>C. reinhardtii</i>                   | NC005353   | NC005353    | NC005353   | NC005353    | NC005353 | AY665726 |
| <i>Chlorella vulgaris</i>               | NC001865   | NC001865    | NC001865   | NC001865    | NC001865 | AB162910 |
| <i>Compsopogon coeruleus</i>            |            | AY119701    | AY391375   | AY876203    | AF087116 | AF342748 |
| <i>Cyanophora paradoxa</i>              | NC001675   | NC001675    | NC001675   | NC001675    | NC001675 | AY823716 |
| <i>Eudorina elegans</i>                 | AB014010   | AB044200–1  | AB044436–7 | AB044486    | D88805   |          |
| <i>E. unicocca</i>                      | AB014007   | AB044207–9  | AB044440   | AB044491–2  | D63434   |          |
| <i>Gonium pectorale</i>                 | AB014016–7 | AB044242    | AB044463   | AB044521    | D63437   |          |
| <i>Gracilaria tenuistipitata</i>        | NC006137   | NC006137    | NC006137   | NC006137    | NC006137 | DQ316995 |
| <i>Marchantia polymorpha</i>            | NC001319   | NC001319    | NC001319   | NC001319    | NC001319 | AB021684 |
| <i>Mesostigma viride</i>                | NC002186   | NC002186    | NC002186   | NC002186    | NC002186 | AJ250109 |
| <i>Nymphaea alba</i>                    | NC006050   | NC006050    | NC006050   | NC006050    | NC006050 |          |
| <i>Oltmannsiellopsis viridis</i>        | NC008099   | NC008099    | NC008099   | NC008099    | NC008099 | D86495   |
| <i>Ostreococcus tauri</i>               | NC008289   | NC008289    | NC008289   | NC008289    | NC008289 | Y15814   |
| <i>Palmaria palmata</i>                 |            | AY119711    | AY391391   | AY876211    | U28421   | Z14142   |
| <i>Pandorina morum</i>                  | AB044180   | AB044231    | AB044456   | AB044510–1  | AB044167 |          |
| <i>Paulschulzia pseudovolvox</i>        | AB014040   | AB044422–3  | AB044473   | AB044531–2  | D86837   | AF408246 |
| <i>Pinus luchuensis</i>                 |            |             |            |             |          | D38246   |
| <i>P. thunbergii</i>                    | NC001631   | NC001631    | NC001631   | NC001631    | NC001631 |          |
| <i>Platydorina caudata</i>              | AB014032   | AB044211–2  | AB044442   | AB044494    | D86828   |          |
| <i>Pleodorina californica</i>           | AB014004   | AB044190–2  | AB044430   | AB044480    | D63439   | FJ610145 |
| <i>P. indica</i>                        | AB014006   | AB044195–7  | AB044432–3 | AB044483    | D86834   |          |
| <i>P. starrii</i>                       | AB214424   | AB214430    | AB214432   | AB214434    | AB214427 |          |
| <i>P. thompsonii</i>                    | AB214407   | AB214410–11 | AB214412   | AB214413    | AB214408 |          |
| <i>Porphyra yezoensis</i>               | NC007932   | NC007932    | NC007932   | NC007932    | NC007932 | D79976   |
| <i>Porphyridium aeruginium</i>          |            | AY119705    | AY391385   | AY876209    | AY119775 | AF168623 |
| <i>Pseudendozonium akinetum</i>         | NC008114   | NC008114    | NC008114   | NC008114    | NC008114 | DQ011230 |
| <i>Psilotum nudum</i>                   | NC003386   | NC003386    | NC003386   | NC003386    | NC003386 | X81963   |
| <i>Rhodella violacea</i>                |            | AY119706    | AY391386   | DQ308461    | AY119776 | AF168624 |
| <i>Stigeoclonium helveticum</i>         | NC008372   | NC008372    | NC008372   | NC008372    | NC008372 | U83131   |
| <i>Tetrabaena socialis</i>              | AB014014   | AB044415    | AB044466   | AB044525    | D63443   | AB278626 |
| <i>Triticum aestivum</i>                | NC002762   | NC002762    | NC002762   | NC002762    | NC002762 | AY049040 |
| <i>Vitreochlamys aulata</i>             | AB076122   | AB076144    | AB076159   | AB076178–80 | AB050492 |          |
| <i>Volvox africanus</i>                 | AB076114   | AB076137    | AB076152   | AB076167    | AB076101 |          |
| <i>V. aureus</i>                        | AB076104   | AB076123    | AB076145   | AB076160    | AB076096 |          |
| <i>V. barberi</i>                       | AB014001   | AB044186    | AB044427   | AB044477    | D86835   |          |
| <i>V. carteri</i> f. <i>nagariensis</i> | AB076108–9 | AB076127–8  | AB076148   | AB076163    | AB076099 | X53904   |
| <i>V. gigas</i>                         | AB076112   | AB076131–2  | AB076150   | AB076165    | AB076084 |          |
| <i>V. globator</i>                      | AB014002   | AB044187    | AB044428   | AB044478    | D86836   |          |
| <i>V. tertius</i>                       | AB076106–7 | AB076125–6  | AB076147   | AB076162    | AB076098 | FJ610144 |
| <i>Volvulina pringsheimii</i>           | AB014028   | AB044220    | AB044447   | AB044499    | D63444   |          |
| <i>Yamagishiella unicocca</i>           | AB014031   | AB044214–5  | AB044444   | AB044496    | D86825   |          |
| <i>Zygnema circumcarinatum</i>          | NC008117   | NC008117    | NC008117   | NC008117    | NC008117 |          |

atpB, beta subunit of ATP synthase; psaA, P700 chlorophyll a-apoprotein A1; psaB, P700 chlorophyll a-apoprotein A2; psbC, photosystem II CP43 apoprotein; rbcl, large subunit of rubisco; 18S, nuclear small ribosomal subunit.
